# Supplementary material for: An Improved Protocol for Agrobacterium-Mediated Transformation in Subterranean Clover (Trifolium subterraneum L.)
Source: MDPI journal article supplement (doi:10.3390/ijms22084181), 2021-04-17
Supplement: s1 [file s1]

**Table S1.** Summary of reagents used.

| <b>Description</b>                      | <b>Provider</b>              | <b>Order in Text</b> |
|-----------------------------------------|------------------------------|----------------------|
| Tween-20                                | Amresco                      | 1                    |
| Cefotaxime                              | PhytoTechnology Laboratories | 2                    |
| Thidiazuron (TDZ)                       | PhytoTechnology Laboratories | 3                    |
| Naphthaleneacetic acid (NAA)            | PhytoTechnology Laboratories | 4                    |
| 1.2 $\mu$ M indole-3-butyric acid (IBA) | PhytoTechnology Laboratories | 5                    |
| Indole-3-acetic acid (IAA)              | Sigma-Aldrich                | 6                    |
| Kinetin                                 | Sigma-Aldrich                | 7                    |
| Agar                                    | PhytoTechnology Laboratories | 8                    |
| Kanamycin                               | PhytoTechnology Laboratories | 9                    |
| Luria Bertani medium                    | Sigma-Aldrich                | 10                   |
| Streptomycin                            | Sigma-Aldrich                | 11                   |
| Spectinomycin                           | Sigma-Aldrich                | 12                   |
| Acetosyringone                          | Sigma-Aldrich                | 13                   |
| Phire® Plant Direct PCR Kit             | Thermo Scientific            | 14                   |
